# Supplementary material
Source: publisher site journal article supplement (https://www.dovepress.com/article/supplementary_file/607849/607849%20Supplementary%20Material.docx)
Supplement: Supplementary file 1 [file 607849%20Supplementary%20Material.docx]

**SUPPLEMENTARY MATERIALS**

**Table S1.** PRISMA Checklist

| **Section and Topic** | **Item #** | **Checklist item** | **Location where item is reported** |
| --- | --- | --- | --- |
| **TITLE** | | |  |
| Title | 1 | Identify the report as a systematic review. | 1 |
| **ABSTRACT** | | |  |
| Abstract | 2 | See the PRISMA 2020 for Abstracts checklist. (made as per the Journal guidelines) | 2 |
| **INTRODUCTION** | | |  |
| Rationale | 3 | Describe the rationale for the review in the context of existing knowledge. | 3 |
| Objectives | 4 | Provide an explicit statement of the objective(s) or question(s) the review addresses. | 3 |
| **METHODS** | | |  |
| Eligibility criteria | 5 | Specify the inclusion and exclusion criteria for the review and how studies were grouped for the syntheses. | 3 |
| Information sources | 6 | Specify all databases, registers, websites, organisations, reference lists and other sources searched or consulted to identify studies. Specify the date when each source was last searched or consulted. | 3 |
| Search strategy | 7 | Present the full search strategies for all databases, registers and websites, including any filters and limits used. | Table S2 |
| Selection process | 8 | Specify the methods used to decide whether a study met the inclusion criteria of the review, including how many reviewers screened each record and each report retrieved, whether they worked independently, and if applicable, details of automation tools used in the process. | 4 |
| Data collection process | 9 | Specify the methods used to collect data from reports, including how many reviewers collected data from each report, whether they worked independently, any processes for obtaining or confirming data from study investigators, and if applicable, details of automation tools used in the process. | 4 |
| Data items | 10a | List and define all outcomes for which data were sought. Specify whether all results that were compatible with each outcome domain in each study were sought (e.g., for all measures, time points, analyses), and if not, the methods used to decide which results to collect. | 4, Table 1 |
| 10b | List and define all other variables for which data were sought (e.g., participant and intervention characteristics, funding sources). Describe any assumptions made about any missing or unclear information. | 4 |
| Study risk of bias assessment | 11 | Specify the methods used to assess risk of bias in the included studies, including details of the tool(s) used, how many reviewers assessed each study and whether they worked independently, and if applicable, details of automation tools used in the process. | 4, |
| Effect measures | 12 | Specify for each outcome the effect measure(s) (e.g. risk ratio, mean difference) used in the synthesis or presentation of results. | 5 |
| Synthesis methods | 13a | Describe the processes used to decide which studies were eligible for each synthesis (e.g. tabulating the study intervention characteristics and comparing against the planned groups for each synthesis (item #5)). | 5, Table 1 |
| 13b | Describe any methods required to prepare the data for presentation or synthesis, such as handling of missing summary statistics, or data conversions. | NA |
| 13c | Describe any methods used to tabulate or visually display results of individual studies and syntheses. | 5 |
| 13d | Describe any methods used to synthesize results and provide a rationale for the choice(s). If meta-analysis was performed, describe the model(s), method(s) to identify the presence and extent of statistical heterogeneity, and software package(s) used. | 5 |
| 13e | Describe any methods used to explore possible causes of heterogeneity among study results (e.g. subgroup analysis, meta-regression). | 5 |
| 13f | Describe any sensitivity analyses conducted to assess robustness of the synthesized results. | 5 |
| Reporting bias assessment | 14 | Describe any methods used to assess risk of bias due to missing results in a synthesis (arising from reporting biases). | NA |
| Certainty assessment | 15 | Describe any methods used to assess certainty (or confidence) in the body of evidence for an outcome. | NA |
| **RESULTS** | | |  |
| Study selection | 16a | Describe the results of the search and selection process, from the number of records identified in the search to the number of studies included in the review, ideally using a flow diagram. | 5, Figure-1, 2 |
| 16b | Cite studies that might appear to meet the inclusion criteria, but which were excluded, and explain why they were excluded. | 5, Table 1 |
| Study characteristics | 17 | Cite each included study and present its characteristics. | Table-1 |
| Risk of bias in studies | 18 | Present assessments of risk of bias for each included study. | Table S3 |
| Results of individual studies | 19 | For all outcomes, present, for each study: (a) summary statistics for each group (where appropriate) and (b) an effect estimate and its precision (e.g. confidence/credible interval), ideally using structured tables or plots. | Table 1, 3 |
| Results of syntheses | 20a | For each synthesis, briefly summarise the characteristics and risk of bias among contributing studies. | 5 |
| 20b | Present results of all statistical syntheses conducted. If meta-analysis was done, present for each the summary estimate and its precision (e.g. confidence/credible interval) and measures of statistical heterogeneity. If comparing groups, describe the direction of the effect. | 5, 6 |
| 20c | Present results of all investigations of possible causes of heterogeneity among study results. | 5, 6 |
| 20d | Present results of all sensitivity analyses conducted to assess the robustness of the synthesized results. | 7 |
| Reporting biases | 21 | Present assessments of risk of bias due to missing results (arising from reporting biases) for each synthesis assessed. | NA |
| Certainty of evidence | 22 | Present assessments of certainty (or confidence) in the body of evidence for each outcome assessed. | NA |
| **DISCUSSION** | | |  |
| Discussion | 23a | Provide a general interpretation of the results in the context of other evidence. | 8 |
| 23b | Discuss any limitations of the evidence included in the review. | 8 |
| 23c | Discuss any limitations of the review processes used. | 8 |
| 23d | Discuss implications of the results for practice, policy, and future research. | 9 |
| **OTHER INFORMATION** | | |  |
| Registration and protocol | 24a | Provide registration information for the review, including register name and registration number, or state that the review was not registered. | 4 |
| 24b | Indicate where the review protocol can be accessed, or state that a protocol was not prepared. | 4 |
| 24c | Describe and explain any amendments to information provided at registration or in the protocol. | NA |
| Support | 25 | Describe sources of financial or non-financial support for the review, and the role of the funders or sponsors in the review. | 10 |
| Competing interests | 26 | Declare any competing interests of review authors. | 10 |
| Availability of data, code and other materials | 27 | Report which of the following are publicly available and where they can be found: template data collection forms; data extracted from included studies; data used for all analyses; analytic code; any other materials used in the review. | 10 |

**Table S2.** The adjusted search terms as per searched electronic databases

| Database | Search Query | Results |
| --- | --- | --- |
|  | | |
| PubMed | (("polycyclic aromatic hydrocarbons" OR "PAHs" OR "polynuclear aromatic hydrocarbons" OR "aromatic hydrocarbons" OR "polycyclic hydrocarbons" OR "polynuclear hydrocarbons" OR "polycyclic aromatic" OR "polynuclear aromatic" OR "mono-hydroxylated polycyclic aromatic hydrocarbons" OR "monohydroxy polycyclic aromatic hydrocarbons" OR "mono-hydroxylated PAHs" OR "monohydroxy PAHs" OR "OH-PAHs" OR "1-hydroxynathalene" OR "2-hydroxynathalene" OR "2-hydroxyfluorene" OR "3-hydroxyfluorene" OR "9-hydroxyfluorene" OR "1-hydroxyphenanthrene" OR "2-hydroxyphenanthrene" OR "3-hydroxyphenanthrene" OR "4-hydroxyphenanthrene" OR "9-hydroxyphenanthrene" OR "1-hydroxypyrene" OR "6-hydroxychrysene"))  AND  ("cardiovascular risk" OR "cardiovascular disease" OR "cardiovascular mortality" OR "myocardial infarction" OR "myocardial ischemia" OR "coronary artery disease" OR "coronary heart disease" OR "ischemic heart disease" OR "heart attack" OR "heart failure" OR "arrhythmia" OR "stroke" OR "peripheral artery disease" OR "atherosclerosis" OR "congestive heart failure" OR "valvular heart disease" OR "heart valve disease" OR "cardiomyopathy" OR "cardiac arrest" OR "angina" OR "tachycardia" OR "bradycardia" OR "atrial fibrillation" OR "cardiovascular events") | **411** |
|  | | |
| Embase | ('polycyclic aromatic hydrocarbons' OR 'pahs' OR 'polynuclear aromatic hydrocarbons' OR 'aromatic hydrocarbons' OR 'polycyclic hydrocarbons' OR 'polynuclear hydrocarbons' OR 'polycyclic aromatic' OR 'polynuclear aromatic' OR 'mono-hydroxylated polycyclic aromatic hydrocarbons' OR 'monohydroxy polycyclic aromatic hydrocarbons' OR 'mono-hydroxylated pahs' OR 'monohydroxy pahs' OR 'oh-pahs' OR '1-hydroxynathalene' OR '2-hydroxynathalene' OR '2-hydroxyfluorene' OR '3-hydroxyfluorene' OR '9-hydroxyfluorene' OR '1-hydroxyphenanthrene' OR '2-hydroxyphenanthrene' OR '3-hydroxyphenanthrene' OR '4-hydroxyphenanthrene' OR '9-hydroxyphenanthrene' OR '1-hydroxypyrene' OR '6-hydroxychrysene' OR '3-hydroxybenzo pyrene')  AND  ("cardiovascular risk" OR "cardiovascular disease" OR "cardiovascular mortality" OR "myocardial infarction" OR "myocardial ischemia" OR "coronary artery disease" OR "coronary heart disease" OR "ischemic heart disease" OR "heart attack" OR "heart failure" OR "arrhythmia" OR "stroke" OR "peripheral artery disease" OR "atherosclerosis" OR "congestive heart failure" OR "valvular heart disease" OR "heart valve disease" OR "cardiomyopathy" OR "cardiac arrest" OR "angina" OR "tachycardia" OR "bradycardia" OR "atrial fibrillation" OR "cardiovascular events") | 1041 |
|  | | |
| Web of Science | (("polycyclic aromatic hydrocarbons" OR "PAHs" OR "polynuclear aromatic hydrocarbons" OR "aromatic hydrocarbons" OR "polycyclic hydrocarbons" OR "polynuclear hydrocarbons" OR "polycyclic aromatic" OR "polynuclear aromatic" OR "mono-hydroxylated polycyclic aromatic hydrocarbons" OR "monohydroxy polycyclic aromatic hydrocarbons" OR "mono-hydroxylated PAHs" OR "monohydroxy PAHs" OR "OH-PAHs" OR "1-hydroxynathalene" OR "2-hydroxynathalene" OR "2-hydroxyfluorene" OR "3-hydroxyfluorene" OR "9-hydroxyfluorene" OR "1-hydroxyphenanthrene" OR "2-hydroxyphenanthrene" OR "3-hydroxyphenanthrene" OR "4-hydroxyphenanthrene" OR "9-hydroxyphenanthrene" OR "1-hydroxypyrene" OR "6-hydroxychrysene"))  AND  ("cardiovascular risk" OR "cardiovascular disease" OR "cardiovascular mortality" OR "myocardial infarction" OR "myocardial ischemia" OR "coronary artery disease" OR "coronary heart disease" OR "ischemic heart disease" OR "heart attack" OR "heart failure" OR "arrhythmia" OR "stroke" OR "peripheral artery disease" OR "atherosclerosis" OR "congestive heart failure" OR "valvular heart disease" OR "heart valve disease" OR "cardiomyopathy" OR "cardiac arrest" OR "angina" OR "tachycardia" OR "bradycardia" OR "atrial fibrillation" OR "cardiovascular events") | 788 |

**Table S3.** Quality assessment using Newcastle-Ottawa Scale

| **STUDY** | **SELECTION (max 4 points)** | | | | **COMPARABILITY (max 2 points)** | **OUTCOME (max 3 points)** | | | **SCORE (out of 9 for cohort/6 for cross-sectional)** |
| --- | --- | --- | --- | --- | --- | --- | --- | --- | --- |
| Representativeness | Selection | Ascertainment | Demonstration of the outcome of interest was not present at start of study | Comparability the basis of the design or analysis | Assessment of outcome | Was follow-up long enough for outcomes to occur? | Adequacy of the follow-up |
| Alshaarawy 2016 (1) | 1 | 1 | 1 | 1 | 1 | 1 | NA | NA | 6 |
| Cao 2020 (2) | 1 | 1 | 1 | 1 | 1 | 1 | 1 | 1 | 8 |
| He 2024 (3) | 1 | 1 | 1 | 1 | 1 | 1 | NA | NA | 6 |
| Hu 2017 (4) | 1 | 1 | 1 | 1 | 1 | 1 | 2 | 1 | 9 |
| Mallah 2022 (5) | 1 | 1 | 1 | 1 | 1 | 1 | NA | NA | 6 |
| Mao 2024 (6) | 1 | 1 | 1 | 1 | 1 | 1 | NA | NA | 6 |
| Rahman 2023 (7) | 1 | 1 | 1 | 1 | 1 | 1 | NA | NA | 6 |
| Shiue 2015 (8) | 1 | 1 | 1 | 1 | 1 | 1 | NA | NA | 6 |
| Xu 2010 (9) | 1 | 1 | 1 | 1 | 1 | 1 | NA | NA | 6 |
| Yang 2019 (10) | 1 | 1 | 1 | 1 | 1 | 1 | 1 | 1 | 8 |
| Zhang 2024 (11) | 1 | 1 | 1 | 1 | 1 | 1 | NA | NA | 6 |

**Table S4**: Exposure, outcome and effect size of the included studies

| Study | Exposure | Outcome | Effect size (95 % CI for Cvd) | Analysis method | Adjusted factors | Key findings |
| --- | --- | --- | --- | --- | --- | --- |
| Alshaarawy 2016 (1) | 1-Hydroxynaphthalene, 2-Hydroxynaphthalene, 2-Hydroxyfluorene, 3-Hydroxyfluorene, 1-Hydroxyphenanthrene, 2-Hydroxyphenanthrene, 3-Hydroxyphenanthrene, 1-Hydroxypyrene | Self-reported CVD | 1.11 (1.04 - 1.18)*, 1.22 (1.08 - 1.38)*, 1.27 (1.12 - 1.43)*, 1.18 (1.06 - 1.32)*, 1.07 (0.94 - 1.21), 1.11 (0.98 - 1.26), 1.10 (0.96 - 1.25), 1.12 (1.00 - 1.26)* | Capillary gas chromatography combined with high resolution mass spectrometry (GCHRMS) | Age (years), sex, ESI (non-Hispanic White, non-Hispanic Black, Hispanic, and all others), education (less than high school, high school, and above high school), PIR, past-year alcohol drinking, BMI (normal, overweight, and obese), total cholesterol (mg/dL), and serum cotinine (ng/mL) | PAH biomarkers were modestly associated with an increased risk of cardiovascular disease (CVD), highlighting the need for further research. |
| Cao 2020 (2) | LMW OH-PAH, HMW OH-PAH, OHNa, OHFlu, OHPh | 10-year risk of ASCVD | 1.22 (1.065 -1.402)*, 1.018 (0.898 - 1.155), 1.158 (1.019 - 1.317)*, 1.246 (1.115 - 1.392)*, 1.079 (0.943 - 1.234) | Gas chromatography coupled with mass spectrometry | Gender, BMI, educational level, history of occupational exposure, physical activity, self-cooking status, smoking amount, drinking status, passive smoking status, and region | Urinary low molecular weight OH-PAHs were significantly associated with an increased 10-year ASCVD risk, with positive dose-response relationships for hydroxynaphthalene, hydroxyfluorene, and hydroxyphenanthrene |
| He 2024 (3) | Total BTEX, Benzene, Toluene, Ethylbenzene, Xylene, | CVD risk | 1.64 (1.23 - 2.19)*, 1.63 (1.25 - 2.12)*, 1.58 (1.20 - 2.07)*, 1.35 (1.09 - 1.66)*, 1.29 (1.04 - 1.59)* | Gas chromatography coupled with mass spectrometry | Age, gender, race, BMI, education, PIR, smoking, alcohol consumption, physical activity, serum cotinine, diabetes, hypertension, family history of CVD, total energy intake, protein intake, and eGFR | Higher blood levels of BTEX compounds (benzene, toluene, ethylbenzene, xylene) are associated with increased cardiovascular disease (CVD) risk, influenced by inflammation, dyslipidemia, and modifying factors like smoking, drinking, and BMI. |
| Hu 2017 (4) | Total PAH, 2-hydroxyfluoren, 9-hydroxyfluoren, 1-hydroxyphenanthrene, 9-hydroxyphenanthrene | 10-year risk of ASCVD | 1.63 (1.13 - 2.34)*, 1.71 (1.19 - 2.44)*, 1.40 (1.01 - 1.77)*, 1.50 (1.05 - 2.14)*, 1.45 (1.04 - 2.02)*, | chromatography-mass spectrometry | Gender, educational level, active and passive smoking, alcohol consumption, physical activity, time spent on transportation, frequency of eating smoked food, self-cooking meals, BMI, MPV, and plasma CC16 | Urinary OH-PAHs levels were strongly associated with increased 10-year ASCVD risk, with MPV and plasma CC16 mediating the relationship, suggesting inflammation and lung function decline as potential mechanisms. |
| Mallah 2022 (5) | Total PAH | Coronary heart disease, Angina, Heart attack, Stroke | 1.24 (1.09 - 1.42)*, 1.3 (1.13 - 1.49)*, 1.28 (1.12 - 1.47)*, 1.17 (1.02 - 1.33)* | Gas chromatography and high-resolution mass spectrometry | age (years), gender (male, female), race, education level, marital status, smoking, drinking, BMI, HDL, LDL, total cholesterol (TC), and triglycerides (TG). | Urinary PAH metabolites were positively associated with the prevalence of various cardiovascular diseases, including heart failure, coronary artery disease, angina, and stroke, highlighting the need for further longitudinal studies. |
| 1-Hydroxynaphthalene | Coronary heart disease, Angina, Heart attack, Stroke | 2.21 (1.89 - 2.58)*, 2.75 (2.33 - 3.25)*, 2.00 (1.74 - 2.32)*, 1.89 (1.62 - 2.20)* |
| 2-Hydroxynaphthalene | Coronary heart disease, Angina, Heart attack, Stroke | 1.75 (1.51 - 2.03)*, 1.83 (1.56 - 2.14)*, 1.39 (1.21 - 1.61)*, 1.48 (1.28 - 1.72)* |
| 3-Hydroxyfluorene | Coronary heart disease, Angina, Heart attack, Stroke | 1.78 (1.53 - 2.08)*, 1.77 (1.51 - 2.09)*, 1.47 (1.27 - 1.69)*, 1.68 (1.44 - 1.95)* |
| 2-Hydroxyfluorene | Coronary heart disease, Angina, Heart attack, Stroke | 1.99 (1.71 - 2.31)*, 2.1 (1.78 - 2.48)*, 1.61 (1.39 - 1.87)*, 1.94 (1.66 - 2.26)* |
| 1-Hydroxypyrene | Coronary heart disease, Angina, Heart attack, Stroke | 1.38 (1.21 - 1.61)*, 1.44 (1.24 - 1.69)*, 1.19 (1.03 - 1.37)*, 1.41 (1.22 - 1.64)* |
| 1-Hydroxyphenanthrene | Coronary heart disease, Angina, Heart attack, Stroke | 1.68 (1.45 - 1.94)*, 1.85 (1.58 - 2.18)*, 1.56 (1.35 - 1.81)*, 1.88 (1.61 - 2.19)* |
| Mao 2024 (6) | 2- hydroxyfluorene | CVD risk | 115.8013 (5.0521 - 2654.3248)* | Capillary gas chromatography | Age, gender, race/ethnicity, education level, marital status, family poverty income ratio (PIR), alcohol consumption, smoking status, diabetes, and hypertension. | Positive correlation between urinary mixed PAH exposure (especially 2-hydroxyfluorene) and cardiovascular diseases, with the TyG index and obesity mediating this association. |
| Rahman 2023 (7) | 1-hydroxynaphthalene 2-hydroxynaphthalene 3-hydroxyfluorene 1-hydroxypyrene | Stroke | 2.327 (0.961 - 5.632), 2.449 (1.067 - 5.622)*, 2.201 (1.115 - 4.346)*, 2.066 (1.037 - 4.114)* | NA | NA | Positive correlation between urinary PAHs (1-hydroxynaphthalene, 2-hydroxynaphthalene, 3-hydroxyfluorene, 1-hydroxypyrene) and urinary manganese levels with increased odds of stroke. |
| Shiue 2015 (8) | 2-hydroxyfluorene | Heart failure, Coronary heart disease, Angina, Heart attack, Stroke | 1.13 (0.68 - 1.88)*, 0.83 (0.56 - 1.23), 0.85 (0.61 - 1.18), 1.27 (0.73 - 2.22)*, 0.96 (0.63 - 1.47) | Gas chromatography tandem mass spectrometry | Urine creatinine, age, sex, body mass index, family income-to-poverty ratio, education level, serum cotinine, alcohol use, physical activity level, and subsampling weighting | Urinary PAHs were positively associated with hypertension, heart attack, and cancer, while inversely associated with angina; further longitudinal or experimental studies are needed to confirm these findings and explore the underlying mechanisms. |
| 3-hydroxyfluorene | Heart failure, Coronary heart disease, Angina, Heart attack, Stroke | 1.07 (0.62 - 1.87), 0.82 (0.55 - 1.22), 0.92 (0.63 - 1.34), 1.18 (0.69 - 2.04), 1.00 (0.71 - 1.41) |
| 9-hydroxyfluorene | Heart failure, Coronary heart disease, Angina, Heart attack, Stroke | 1.04 (0.62 - 1.77), 0.87 (0.65 - 1.17), 0.97 (0.71 - 1.34), 1.05 (0.68 - 1.62), 1.03 (0.63 - 1.68) |
| 1-hydroxyphenanthrene | Heart failure, Coronary heart disease, Angina, Heart attack, Stroke | 0.73 (0.39 - 1.34), 1.08 (0.75 - 1.57), 1.02 (0.57 - 1.83), 1.14 (0.65 - 2.00), 0.93 (0.54 - 1.60) |
| 2-hydroxyphenanthrene | Heart failure, Coronary heart disease, Angina, Heart attack, Stroke | 1.06 (0.56 - 2.01), 1.11 (0.73 - 1.69), 1.10 (0.55 - 2.20), 1.32 (0.80 - 2.17), 0.81 (0.45 - 1.47) |
| 3-hydroxyphenanthrene | Heart failure, Coronary heart disease, Angina, Heart attack, Stroke | 0.76 (0.42 - 1.40), 0.83 (0.60 - 1.14), 0.95 (0.57 - 1.58), 1.10 (0.67 - 1.81), 0.91 (0.57 - 1.45), 1.05 (0.68 - 1.63) |
| 1-hydroxypyrene | Heart failure, Coronary heart disease, Angina, Heart attack, Stroke | 0.99 (0.59 - 1.66), 1.10 (0.83 - 1.47), 1.21 (0.71 - 2.05), 1.47 (1.05 - 2.06)*, |
| 1-hydroxynapthalene | Heart failure, Coronary heart disease, Angina, Heart attack, Stroke | 1.00 (0.64 - 1.57), 0.71 (0.47 - 1.07), 0.92 (0.70 - 1.20), 1.01 (0.67 - 1.51), 1.21 (0.95 - 1.56) |
| 4-hydroxyphenanthrene | Heart failure, Coronary heart disease, Angina, Heart attack, Stroke | 0.70 (0.39 - 1.29), 0.76 (0.48 - 1.18), 1.08 (0.61 - 1.91), 1.02 (0.56 - 1.85), 0.73 (0.42 - 1.28) |
| 2-hydroxynapthalene | Heart failure, Coronary heart disease, Angina, Heart attack, Stroke | 1.01 (0.68 - 1.51), 0.58 (0.34 - 1.00), 0.56 (0.33 - 0.95), 0.95 (0.50 - 1.79), 1.28 (0.85 - 1.92) |
| Xu 2010 (9) | 1-NAP, 2-NAP, 2-FLUO, 3-FLUO, 1-PHEN, 2-PHEN, 3-PHEN, 1-PYR | Self-reported CVD | 1.32 (0.85–2.07), 1.27 (0.94–1.72), 1.31 (0.97–1.76), 1.12 (0.78–1.62), 1.28 (0.93–1.76), 1.45 (1.01–2.07)*, 1.34 (0.92–1.96), 0.96 (0.59–1.56) | Gas chromatography/isotope dilution high-resolution mass spectrometry (GC/IDHRMS) | age, gender, race/ethnicity, alcohol drinking, body mass index, serum cotinine, and hypertension. | Exposure to urinary PAHs was associated with self-reported cardiovascular diseases (CVD) independent of cigarette smoking, with a dose–response relationship observed between PAH exposure and CVD. |
| Yang 2019 (10) | 1-hydroxynaphthalene, 2-hydroxynaphthalene, Total PAH | ASCVD risk | 2.36 (1.47 - 3.78)*, 6.58 (3.90 - 11.09)*, 1.60 (1.03 - 2.49)* | gas chromatography-mass spectrometry (GC-MS) | Age, sex, BMI, drinking status, physical activity, education, workshift, and work sites | Elevated urinary PAH metabolites were dose-responsively related to increased risk of ASCVD among coke oven workers, with HRV indices mediating a significant proportion of this association. |
| Zhang 2024 (11) | Total PAH, 2-hydroxynaphthalene | Stroke | 1.97 (1.11 - 3.52)*, 2.23 (1.17 - 4.25)* | NA | Age, gender, smoking status, drinking status, education level, marital status, physical activity, hypertension, low-density lipoprotein cholesterol, and BMI | High urinary PAH exposure was associated with an increased risk of diabetes and stroke, with diabetes mediating 5% of the association between PAH exposure and stroke risk. |

***Significant, Abbreviations**: PAHs: Polycyclic Aromatic Hydrocarbons; HTN: Hypertension; OR: Odds Ratio; CI: Confidence Interval; BMI: Body Mass Index; PAEs: Phthalate Esters; DEP: Diethyl Phthalate; DIBP: Diisobutyl Phthalate; BKF: Benzo(k)fluoranthene; ANT: Anthracene; BAP: Benzo(a)pyrene; OH-PAHs: Hydroxylated Polycyclic Aromatic Hydrocarbons; OH-Flu: Hydroxylated Fluorene; NA: Not Available; MetS: Metabolic Syndrome; 1-OHNap: 1-Hydroxynaphthalene; 2-OHNap: 2-Hydroxynaphthalene; 2-OHFlu: 2-Hydroxyfluorene; 3-OHFlu: 3-Hydroxyfluorene; 1-OHPh: 1-Hydroxyphenanthrene; 2-OHPh: 2-Hydroxyphenanthrene; 3-OHPh: 3-Hydroxyphenanthrene; 1-OHPy: 1-Hydroxypyrene; LMW OH-PAHs: Low Molecular Weight Hydroxylated Polycyclic Aromatic Hydrocarbons; HMW OH-PAHs: High Molecular Weight Hydroxylated Polycyclic Aromatic Hydrocarbons; OHNa: Hydroxynaphthalene; OHFlu: Hydroxyfluorene; OHPh: Hydroxyphenanthrene; B: Benzene; T: Toluene; EB: Ethylbenzene; X: Xylene; 2-PHEN: 2-Hydroxyphenanthrene; 3-PHEN: 3-Hydroxyphenanthrene; 1-PHEN: 1-Hydroxyphenanthrene; 9-HFlu: 9-Hydroxyfluorene; 2-HFlu: 2-Hydroxyfluorene; 1-NAP: 1-Naphthalene, CVD - Cardiovascular Disease, ASCVD - Atherosclerotic Cardiovascular Disease.

**Supplementary References**

1. Alshaarawy O, Elbaz HA, Andrew ME. The association of urinary polycyclic aromatic hydrocarbon biomarkers and cardiovascular disease in the US population. Environment international. 2016;89:174-8.

2. Cao L, Wang D, Zhu C, Wang B, Cen X, Chen A, et al. Polycyclic aromatic hydrocarbon exposure and atherosclerotic cardiovascular disease risk in urban adults: The mediating role of oxidatively damaged DNA. Environmental Pollution. 2020;265:114860.

3. He Y, Qiu H, Wang W, Lin Y, Ho KF. Exposure to BTEX is associated with cardiovascular disease, dyslipidemia and leukocytosis in national US population. Science of The Total Environment. 2024;919:170639.

4. Hu C, Hou J, Zhou Y, Sun H, Yin W, Zhang Y, et al. Association of polycyclic aromatic hydrocarbons exposure with atherosclerotic cardiovascular disease risk: a role of mean platelet volume or club cell secretory protein. Environmental Pollution. 2018;233:45-53.

5. Mallah MA, Changxing L, Mallah MA, Naveed M, Liu Y, Noreen S, et al. Association of urinary polycyclic aromatic hydrocarbon metabolites and cardiovascular disease among US population: a cross-sectional study. Environmental research. 2022;209:112775.

6. Mao Q, Zhu X, Zhang X, Kong Y. Triglyceride-glucose Index and Its combination with obesity indicators mediating the association between 2-hydroxyfluorene and the prevalence of cardiovascular disease: Evidence from the NHANES (2005–2018). Ecotoxicology and Environmental Safety. 2024;287:117283.

7. Rahman HH, Sheikh SP, Munson-McGee SH. Arsenic, polycyclic aromatic hydrocarbons, and metal exposure and risk assessment of stroke. Environmental Science and Pollution Research. 2023;30(37):86973-86.

8. Shiue I. Are urinary polyaromatic hydrocarbons associated with adult hypertension, heart attack, and cancer? USA NHANES, 2011–2012. Environmental Science and Pollution Research. 2015;22:16962-8.

9. Xu X, Cook RL, Ilacqua VA, Kan H, Talbott EO, Kearney G. Studying associations between urinary metabolites of polycyclic aromatic hydrocarbons (PAHs) and cardiovascular diseases in the United States. Science of the total Environment. 2010;408(21):4943-8.

10. Yang L, Guo W, Zeng D, Ma L, Lai X, Fang Q, et al. Heart rate variability mediates the association between polycyclic aromatic hydrocarbons exposure and atherosclerotic cardiovascular disease risk in coke oven workers. Chemosphere. 2019;228:166-73.

11. Zhang A, Zhang H, Mi L, Ding L, Jiang Z, Yu F, et al. Diabetes: a potential mediator of associations between polycyclic aromatic hydrocarbon exposure and stroke. Environmental Science and Pollution Research. 2024:1-11.
